# Supplementary material
Source: PubMed Central journal article supplement (PMC4649246)
Supplement: AAC.01343-15_zac012154583so1.pdf [file AAC.01343-15_zac012154583so1.pdf]

## Supplemental Material

### Materials and Methods

**Purification of OXA-58.** Two-liter cultures of *Acinetobacter baumannii* strain Ab290 (pOXA-58-2) were grown in LB broth at 37 °C for 2 h. Protein expression was induced by adding 8 µg/ml imipenem and incubating for further 4 h. Cells were harvested by centrifugation at 6,000 rpm for 30 min, and cell pellets were stored at -20 °C until further use. OXA-58 was purified by nickel-chelated immobilized metal affinity chromatography (IMAC, GE Healthcare Bio-Sciences Corp., NJ). Briefly, cell pellets were resuspended in chilled lysis buffer (50 mM Tris-HCl, 200 mM NaCl, pH 9.0). Cell suspensions were sonicated with 10 short bursts of 10 s each with 30 s of cooling between bursts, and cell debris was removed by centrifugation at 32,000 rpm at 4 °C for 45 min. The supernatant was loaded onto a 10 ml Ni Sepharose 6 Fast Flow resin (GE Healthcare Bio-Sciences Corp) that was equilibrated with column buffer (50 mM Tris-HCl pH 9.0, 200 mM NaCl, 5 mM imidazole). After loading the supernatant, the column was washed 5 times with 10 ml of column buffer. Protein was eluted with 500 mM imidazole in column buffer. Fractions containing OXA-58 were analysed by SDS-PAGE and confirmed by Western blotting with anti-OXA-58 polyclonal antibody. Fractions containing a single protein band were pooled and dialyzed against phosphate buffered saline (PBS). Protein concentrations were

determined by Bradford assay (Bio-Rad Laboratories, Richmond, CA) and aliquots were stored at  $-80\text{ }^{\circ}\text{C}$  until further use.

**Gel-assisted enzymatic digestion of outer membrane vesicles (OMVs).** OMVs were mixed with an equal volume of a solution containing N,N,N',N'-Tetramethylene diamine, 10 % ammonium persulfate, and 30 % bis-acrylamide and keep in the dark until the gel polymerized. The gel was cut into small pieces and trypsin digested in ammonium bicarbonate buffer (pH 7.8) at  $37\text{ }^{\circ}\text{C}$  overnight at an enzyme: protein w/w ratio of 1:30. The digested peptides were extracted with 50 % acetonitrile (ACN), lyophilized, and stored at  $-80\text{ }^{\circ}\text{C}$  until identified by LCMS/MS (1).

**LC-MS/MS analysis and data analysis.** Peptides were analyzed by SYNAPT HDMS ESI-Q-TOF coupling using a nanoACQUITY UPLC system (Waters Corp., Milfors, MA). LC separation was performed using a reverse phase C18 capillary column ( $75\text{ }\mu\text{m} \times 100\text{ mm}$ ; particle size:  $1.7\text{ }\mu\text{m}$ , Waters Corp.) with a trap column ( $180\text{ }\mu\text{m} \times 20\text{ mm}$ ; particle size:  $5\text{ }\mu\text{m}$ , Waters Corp.). The flow rate was set at  $0.3\text{ }\mu\text{l}/\text{min}$  and the gradient was 1-50 % of Mobile phase B for 30 min, 50-65 % of Mobile phase B for 20 min, 65 % Mobile phase B for another 5 min, and then back to 1 % of Mobile phase B for 10 min (Mobile phase A: 5 %ACN/0.1 % formic acid (FA);

Mobile phase B: 95 %ACN/0.1 %FA). The MS scan was set from 400-1600 m/z, and the MS/MS acquisition started from 50 m/z. The four most intense ions from the MS scan were selected for the MS/MS scans. Raw data from G1 Q-TOF were processed into peak lists by Masslynx software version 4.0 (Waters Corp.) for further protein identification using the search algorithm MASCOT (version 2.4, Matrix Science, London, UK). The *A. baumannii* database at the National Center for Biotechnology Information was used for protein identification. Search parameters included trypsin cleavage at the C-termini of lysine and arginine and two maximum missed cleavages were allowed. The mass tolerance was set at  $\pm 0.2$  Da (2).

**Checkerboard microdilution.** The imipenem minimum inhibitory concentration in the presence and absence of SecA inhibitors was determined using Mueller-Hinton broth (MHB; Difco, Detroit, MI) and a microdilution checkerboard procedure (3). A two-dimensional checkerboard with 2-fold dilutions of imipenem and 2-fold dilutions of SecA inhibitors was prepared. Control wells containing media only were included in each plate.

**Alkaline phosphatase activity assay.** To measure alkaline phosphatase activity, *A. baumannii* strain Ab290 (pOXA-58-2) was grown to logarithmic phase in LB with or

without rose bengal. Cells from 1 ml aliquots of the cultures were harvested, washed once with 1 ml Tris-HCl (pH 8.0), and resuspended in 1 ml assay buffer (1 M Tris-HCl, 0.1 mM ZnCl<sub>2</sub>, 0.1 mM CaCl<sub>2</sub>, pH 8.0). Cells were permeabilized with 50 µl of chloroform and 50 µl of 0.1 % SDS, vortexed gently, and incubated at 30 °C for 20 min prior to centrifugation. After centrifugation, 200 µl of the upper aqueous phase was transferred to the well of a microplate, 25 µl of *p*-nitrophenylphosphate (pNpp) (Sigma-Aldrich, St. Louis, MO) was added, and the mixture was incubated at 30 °C. Formation of *p*-nitrophenol was measured by absorbance at 405 nm (4).

## References

1. **Lu X, Zhu H.** 2005. Tube-gel digestion: a novel proteomic approach for high throughput analysis of membrane proteins. *Mol Cell Proteomics* : MCP **4**:1948-1958.
2. **Chen JH, Chang YW, Yao CW, Chiueh TS, Huang SC, Chien KY, Chen A, Chang FY, Wong CH, Chen YJ.** 2004. Plasma proteome of severe acute respiratory syndrome analyzed by two-dimensional gel electrophoresis and mass spectrometry. *Proc Natl Acad Sci USA* **101**:17039-17044.
3. **Clinical and Laboratory Standards Institute.** 2015. Methods for dilution antimicrobial susceptibility tests for bacteria that grow aerobically, 10th ed. Approved standard M7-A10. CLSI, Wayne, PA.
4. **Tse YM, Yu M, Tsang JS.** 2009. Topological analysis of a haloacid permease of a *Burkholderia sp.* bacterium with a PhoA-LacZ reporter. *BMC microbiol* **9**:233.

**Table S1.** Primers used in this study <sup>a</sup>

| Primer                | Sequence, 5'–3'                           |
|-----------------------|-------------------------------------------|
| IS1008(XbaI)F         | tctagaTCTATTTGCAACAGTGCCATTTTCTT          |
| XbaIIS1008            | tctagaTCGGCACTTTCAAGGTGAAAT               |
| IS1008(M-BamHI)R      | ggatccCATGATATACAACCTTAAAATTTGG           |
| IS1008(BamHI)F        | CCGggatccTCTATTTGCAACAGTGCCATTTTCTT       |
| IS1008(NcoI)R         | CTAGccatggACATGATATACAACCTTAAAATTTGGTAGTG |
| IS1008-ΔP2-1(XbaI)F   | tctagaTTGCAACAGTGCCATTTTCTT               |
| IS1008-ΔP2-2(XbaI)F   | CTAGtctagaAACAGTGCCATTTTCTTTATAC          |
| IS1008-ΔP2-3(XbaI)F   | CTAGtctagaACAGTGCCATTTTCTTTATACTAT        |
| OXA-58(XhoI)R         | ctcgagTTATAAATAATGAAAAACACC               |
| NcoIOXA58             | ccatggTTATAAATAATGAAAAACACCCA             |
| OXA-58Δ20aaSP(BamHI)F | ggatccGAGCATAGTATGAGTCGA                  |
| OXA-58(XhoI)R         | ctcgagTTATAAATAATGAAAAACACC               |
| OXA-58-20aaSP(NcoI)R  | CATGccatggCACAAGCCCCAATACTTATGC           |
| OXA-58-CΔ5aa(XhoI)R   | CCGctcagaTTAACCCAACCTTATCTAGCACATCTAAA    |
| OXA-58-CΔ10aa(XhoI)R  | CCGctcagaTTACACATCTAAAGACAATTGTTTACGT     |
| OXA-58-CΔ15aa(XhoI)R  | CCGctcgagTTATTGTTTACGTAGAGCAATATCATCA     |
| ISAbal(XbaI)F         | tctagaCACGAATGCAGAAGTTG                   |
| OXA-23-like(XhoI)R    | ctcgagAATAATATTCAGCTGTTTTAATG             |
| OXA-24-like(XbaI)F    | tctagaCTCTAAGCCCCAAAATTTCC                |
| OXA-24-like(XhoI)R    | ctcgagAATGATTCCAAGATTTTCTAGCG             |
| OXA-51-like(XhoI)R    | ctcgagTAAAATACCTAATTGTTCTAA               |

<sup>a</sup> Lower-case letters indicate restriction sites.

**Table S2.** Proteins identified in Ab290 (pOXA-58-2) OMVs by 2DE and MS/MS

analysis

| Accession no. | MW<br>(Da) | pI   | Protein                                            | Matched Coverage |          |     |
|---------------|------------|------|----------------------------------------------------|------------------|----------|-----|
|               |            |      |                                                    | Score            | peptides | (%) |
| gi 425484345  | 42851      | 5.21 | Translation elongation factor<br>Tu                | 595              | 35       | 57  |
| gi 425699439  | 37953      | 5.3  | Outer membrane protein<br>Omp38                    | 389              | 37       | 31  |
| gi 301347500  | 54408      | 5.05 | Chaperonin GroEL                                   | 265              | 17       | 39  |
| gi 183208476  | 100043     | 5.25 | Aconitase A                                        | 216              | 13       | 14  |
| gi 126641617  | 52602      | 5.57 | 30S ribosomal protein S1                           | 212              | 14       | 20  |
| gi 422942104  | 14435      | 6.64 | Elongation factor Tu GTP<br>binding domain protein | 211              | 14       | 45  |
| gi 408511889  | 56018      | 5.57 | IMP cyclohydrolase                                 | 186              | 6        | 13  |
| gi 162286755  | 50243      | 5.03 | F0F1 ATP synthase subunit<br>beta                  | 184              | 11       | 25  |
| gi 425496383  | 22878      | 5.56 | Superoxide dismutase (Fe)                          | 155              | 7        | 31  |
| gi 422944122  | 30702      | 5.6  | Succinate-CoA ligase, alpha                        | 154              | 6        | 16  |

|              |       |      |                                                             |     |    |    |
|--------------|-------|------|-------------------------------------------------------------|-----|----|----|
|              |       |      | subunit                                                     |     |    |    |
| gi 425495090 | 78880 | 5.05 | Translation elongation factor G                             | 136 | 11 | 22 |
| gi 169150075 | 37082 | 6.14 | Phenylalanyl-tRNA synthetase,<br>alpha-subunit              | 127 | 3  | 9  |
| gi 400204896 | 57226 | 4.86 | Chaperonin GroL                                             | 119 | 9  | 18 |
| gi 213056438 | 27562 | 5.47 | 3-hydroxybutyrate<br>dehydrogenase                          | 95  | 4  | 30 |
| gi 126640373 | 11787 | 5.09 | 50S ribosomal protein                                       | 89  | 3  | 16 |
| gi 410396584 | 63475 | 5.69 | Putative negative regulator of<br>genetic competence        | 88  | 10 | 18 |
| gi 395552217 | 77826 | 5.85 | ClpC/MecB<br>Fatty oxidation complex, alpha<br>subunit FadB | 80  | 4  | 6  |
| gi 425492474 | 4995  | 9.66 | Entericidin EcnA/B family<br>protein                        | 79  | 2  | 34 |
| gi 407901835 | 84951 | 5.08 | Aconitate hydratase 2                                       | 79  | 7  | 11 |
| gi 425491061 | 35329 | 5.2  | Malate dehydrogenase                                        | 79  | 8  | 26 |
| gi 425492452 | 67016 | 5.94 | Succinate dehydrogenase,<br>flavoprotein subunit            | 74  | 4  | 7  |



|              |       |       |                                  |    |   |    |
|--------------|-------|-------|----------------------------------|----|---|----|
| gi 425489025 | 21174 | 5.31  | OmpW family protein              | 71 | 3 | 24 |
|              |       |       | Succinate dehydrogenase and      |    |   |    |
| gi 400203568 | 24143 | 6.3   | fumarate reductase iron-sulfur   | 68 | 3 | 13 |
|              |       |       | protein                          |    |   |    |
|              |       |       | Outer membrane assembly          |    |   |    |
| gi 425491451 | 41003 | 9.1   | lipoprotein YfgL                 | 70 | 3 | 8  |
|              |       |       | 3-oxoacyl-[acyl-carrier-protein] |    |   |    |
| gi 169152905 | 26807 | 6.1   | reductase                        | 67 | 2 | 11 |
| gi 301510213 | 45894 | 4.81  | Aspartate kinase                 | 64 | 1 | 6  |
| gi 169151156 | 14222 | 10.05 | 30S ribosomal protein S8         | 63 | 4 | 32 |
|              |       |       | Translation elongation factor    |    |   |    |
| gi 425496343 | 30607 | 5.27  | Ts                               | 62 | 4 | 14 |
| gi 169148062 | 82621 | 5.63  | Isocitrate dehydrogenase         | 58 | 4 | 11 |
|              |       |       | Dihydrolipoyllysine-residue      |    |   |    |
| gi 301510300 | 33381 | 6.64  | succinyltransferase              | 55 | 8 | 20 |
| gi 311350290 | 20094 | 5.77  | <b>Oxacillinase 58, partial</b>  | 54 | 7 | 55 |
| gi 301511454 | 59346 | 5.31  | Isocitrate lyase                 | 54 | 1 | 2  |
| gi 425699254 | 46216 | 5.81  | Glutamate dehydrogenase          | 51 | 1 | 11 |
| gi 422945433 | 20774 | 5.01  | Peroxisredoxin                   | 47 | 4 | 14 |

|              |       |      |                              |    |   |   |
|--------------|-------|------|------------------------------|----|---|---|
| gi 213155931 | 22774 | 5.26 | Putative deoxyribonucleotide | 45 | 1 | 9 |
|              |       |      | triphosphate pyrophosphatase |    |   |   |

---

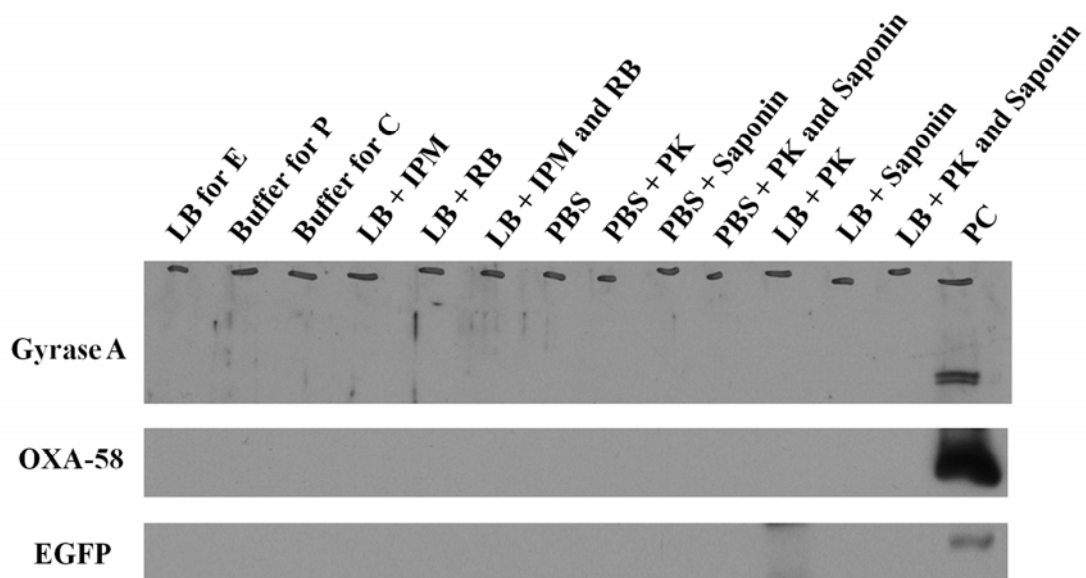

**FIG S1.** Sample buffers were negative for gyrase A, OXA-58, and EGFP. Samples included Luria-Bertani (LB) broth for the extracellular fraction (E), osmotic shock buffer (30 mM Tris-HCl, 20% sucrose, pH 8.1) for the periplasmic fraction (P), lysis buffer (3 mM EDTA, pH 7.3) for the cytoplasmic fraction (C), LB broth with 8  $\mu\text{g}/\text{ml}$  imipenem (IPM), LB broth with 12.5  $\mu\text{g}/\text{ml}$  rose bengal (RB), LB broth with 8  $\mu\text{g}/\text{ml}$  IPM and 12.5  $\mu\text{g}/\text{ml}$  RB, phosphate-buffered saline (PBS), PBS with 100  $\mu\text{g}/\text{ml}$  proteinase K (PK), PBS with 2% saponin, and PBS with 100  $\mu\text{g}/\text{ml}$  PK and 2% saponin. The positive control (PC) sample for gyrase was derived from the extracellular fraction of IPM-treated *Acinetobacter baumannii*, the PC sample for OXA-58 was purified OXA-58 protein, and the PC sample for EGFP was EGFP fused with the OXA-58 signal peptide.

A

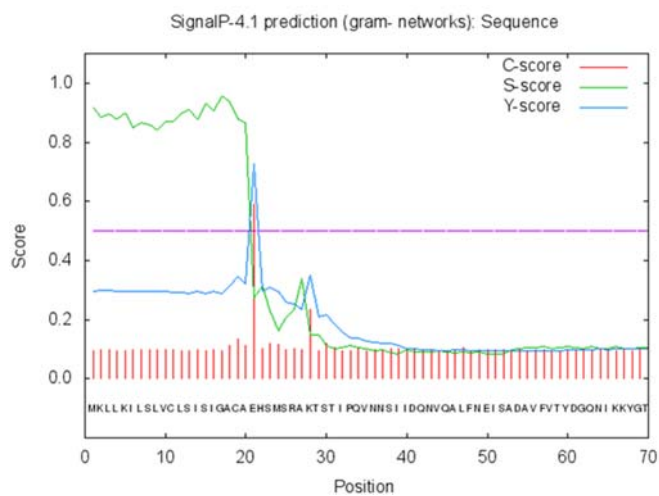

B

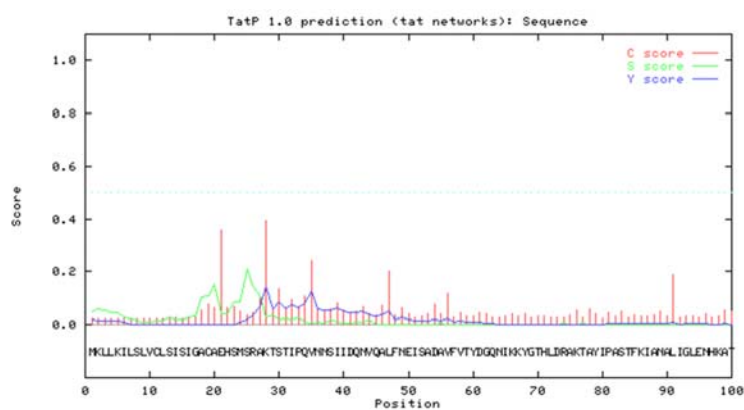

**FIG S2.** *In silico* analysis of the OXA-58 signal sequence predicted that OXA-58 was preferentially translocated via the Sec system. The OXA-58 signal peptide was predicted with the SignalP 4.0 (A) and Tat 1.0 (B) servers. The S score (green line) was used to predict the residues of the signal peptide. The cleavage site was determined by the C score (red lines). The better cleavage site was determined by the Y score, which combines the predictions of the S and C scores.

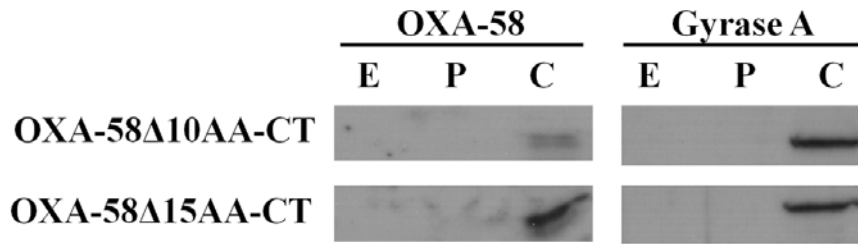

**FIG S3.** Extracellular release and periplasmic translocation of OXA-58 were dependent on the C-terminus. Western blot analysis of truncated OXA-58 fractions from *Acinetobacter baumannii* strains that express OXA-58 with the last 10 C-terminal amino acids deleted (OXA-58 $\Delta$ 10AA-CT) or OXA-58 with the last 15 C-terminal amino acids deleted (OXA-58 $\Delta$ 15AA-CT). E, P, and C indicate extracellular, periplasmic, and cytoplasmic fractions, respectively.

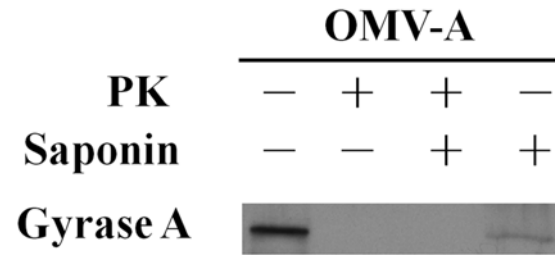

**FIG S4.** Extracellular gyrase from IPM-treated *A. baumannii* was susceptible to proteinase K (PK) degradation. Western blot analysis of extracellular gyrase treated with (+) or without (-) 100 µg/ml PK, 2% saponin, or both.

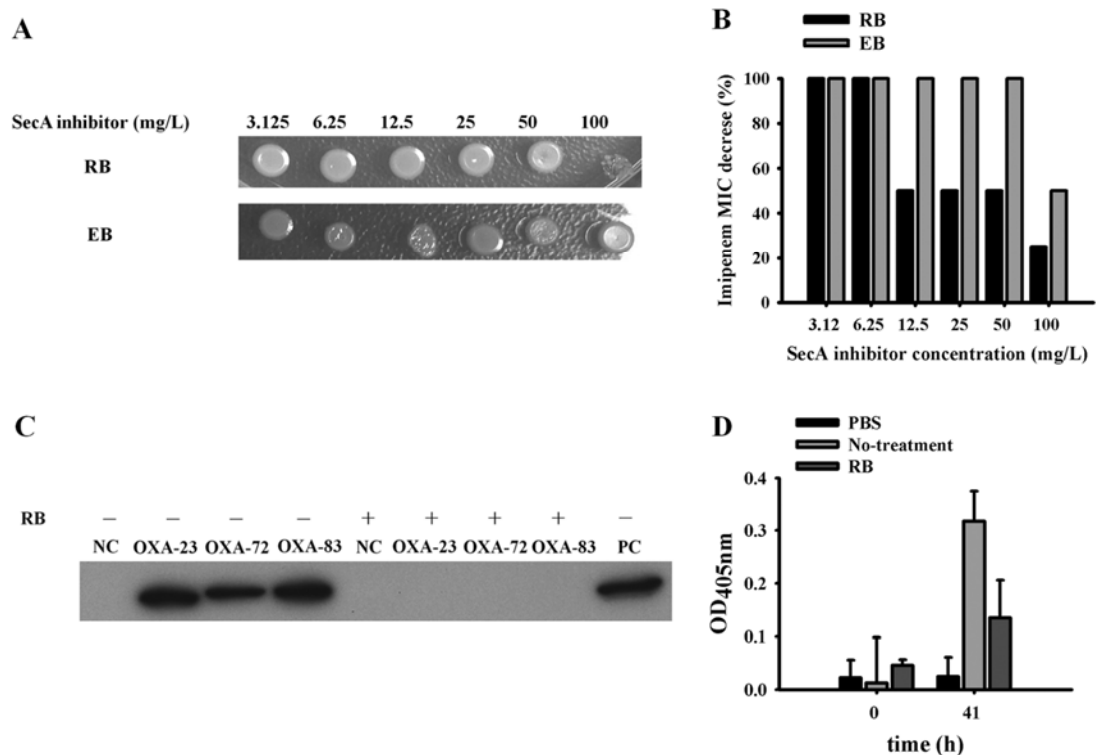

**FIG S5.** The effects of SecA inhibitors rose bengal and erythrosin B. (A) Addition of both SecA inhibitors up to 100  $\mu\text{g/ml}$  did not inhibit the growth of *A. baumannii* strain Ab290 (pOXA-58-2). (B) The checkerboard microdilution assay showed that addition of rose bengal (RB) and erythrosin B (EB) at sublethal doses decreased the imipenem minimum inhibitory concentration (MIC) of Ab290 (pOXA-58-2) and showed that RB was more potent than EB. (C) Western blot analysis using anti-His antibody to detect His-tagged OXA-23, OXA-72, and OXA-83 in OMVs. OMVs from the strain carrying the shuttle vector pYMAb-2 were used as the negative control (NC). Purified OXA-58 was used as the positive control (PC). RB inhibited the OMV-associated release of OXAs. (D) RB inhibited another Sec-dependent periplasmic protein, alkaline phosphatase (Alk-P). Enzyme activity of Alk-P from the periplasm of strain

Ab290 (pOXA-58-2) with or without RB treatment, was determined by formation of *p*-nitrophenol from *p*-nitrophenylphosphate (pNpp), which was measured by absorbance at 405 nm. In the phosphate buffered saline (PBS) group, PBS was incubated with pNpp as a negative control.



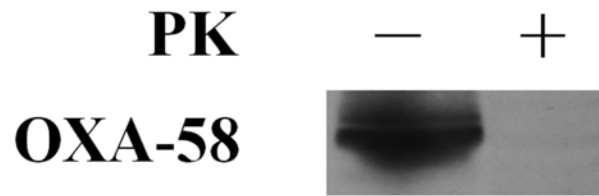

**FIG S6.** The extracellular OXA-58 collected after bacteria was treated with imipenem and rose bengal was susceptible to proteinase K degradation. After *A. baumannii* was treated with rose bengal and imipenem, extracellular OXA-58 were collected and concentrated with a 10 kDa MWCO Amicon Ultra centrifugal concentrator. This extracellular OXA-58 was degraded by proteinase K (PK), indicating that it was OMV independent.
